# Supplementary material
Source: PubMed Central journal article supplement (PMC4433474)
Supplement: NIHMS686544-supplement-01.pdf [file NIHMS686544-supplement-01.pdf]

## Appendix 1:

MNI coordinates of structural hemispheric asymmetries in the temporal cortex as assessed by VBM. Please note that there exist also several other studies that investigated cerebral asymmetry by VBM, but do not report exact MNI coordinates (e.g., Luders et al. (42), Eckert et al. (48), Good et al (16)).

| <b>Study</b>                  | <b>MNI coordinates of asymmetry in temporal cortex</b>                                                                                                                 |
|-------------------------------|------------------------------------------------------------------------------------------------------------------------------------------------------------------------|
| Jansen et al. (present study) | -41 -31 11 (n=10; healthy subjects with left-hemispheric language dominance)<br>-47 -26 8 (n=10; healthy subjects with right-hemispheric language dominance)           |
| Hervé et al. (17)             | -39 -32 12 (n=56, healthy right-handed subjects, unknown language dominance)                                                                                           |
| Dorsaint-Pierre et al. (18)   | -44 -30 12 (n=44; epileptic patients; 20 with left-hemispheric language dominance, 13 with bilateral language dominance, 11 with right-hemispheric language dominance) |
